# Supplementary material for: Interzeolite conversion of a micronsized FAU to a nanosized CHA zeolite free of organic structure directing agent with a high CO2capacity
Source: Royal Society of Chemistry journal article supplement (doi:10.1039/d0ra04937a), 2020-01-01
Supplement: d0ra04937a1.pdf [file d0ra04937a1.pdf]

## **Interzeolite conversion of micronized FAU to nanosized CHA zeolite free of organic structure directing agent with high a CO<sub>2</sub> capacity**

Kristoffer H. Møller<sup>1,2</sup>, Maxime Debost<sup>2</sup>, Louwanda Lakiss<sup>2</sup>, Søren Kegnæs<sup>1\*</sup>, Svetlana Mintova<sup>2\*</sup>

<sup>1</sup>Technical University of Denmark, Department of Chemistry, Kemitorvet 207, 2800 Kongens Lyngby, Denmark

<sup>2</sup>ENSICAEN, Laboratoire Catalyse & Spectrochimie, 6 Boulevard Maréchal Juin, 14050 Caen Cedex 4, France

## Supporting information

**Table S1: List of conditions for selected synthesis samples**

| Entry # | Name     | FAU source | H <sub>2</sub> O/Si | K/Si | Na/Si | Time / h | Phase           | Yield <sup>a</sup> |
|---------|----------|------------|---------------------|------|-------|----------|-----------------|--------------------|
| 1       | CHA(1.9) | CBV400     | 40                  | 0.76 | 0.25  | 96       | CHA*            | 113%               |
| 2       |          | CBV400     | 40                  | 0.51 | 0.51  | 96       | CHA + minor FAU |                    |
| 3       |          | CBV720     | 30                  | 0.5  | -     | 168      | Amorphous       |                    |
| 4       | CHA(2.3) | CBV720     | 30                  | 1    | -     | 168      | CHA**           | 24%                |

<sup>a</sup>Yield calculated by (mass product)/(mass starting zeolite) \*Minor impurity of LTA or GME

\*\*Minor impurity of LTL

## ICP analysis

**Table S2: ICP results for CHA zeolite samples**

| Sample   | Si/Al | Na/Al | K/Al |
|----------|-------|-------|------|
| CHA(1.9) | 1.9   | 0.06  | 0.93 |
| CHA(2.3) | 2.3   | 0.01  | 0.97 |

**SEM images**

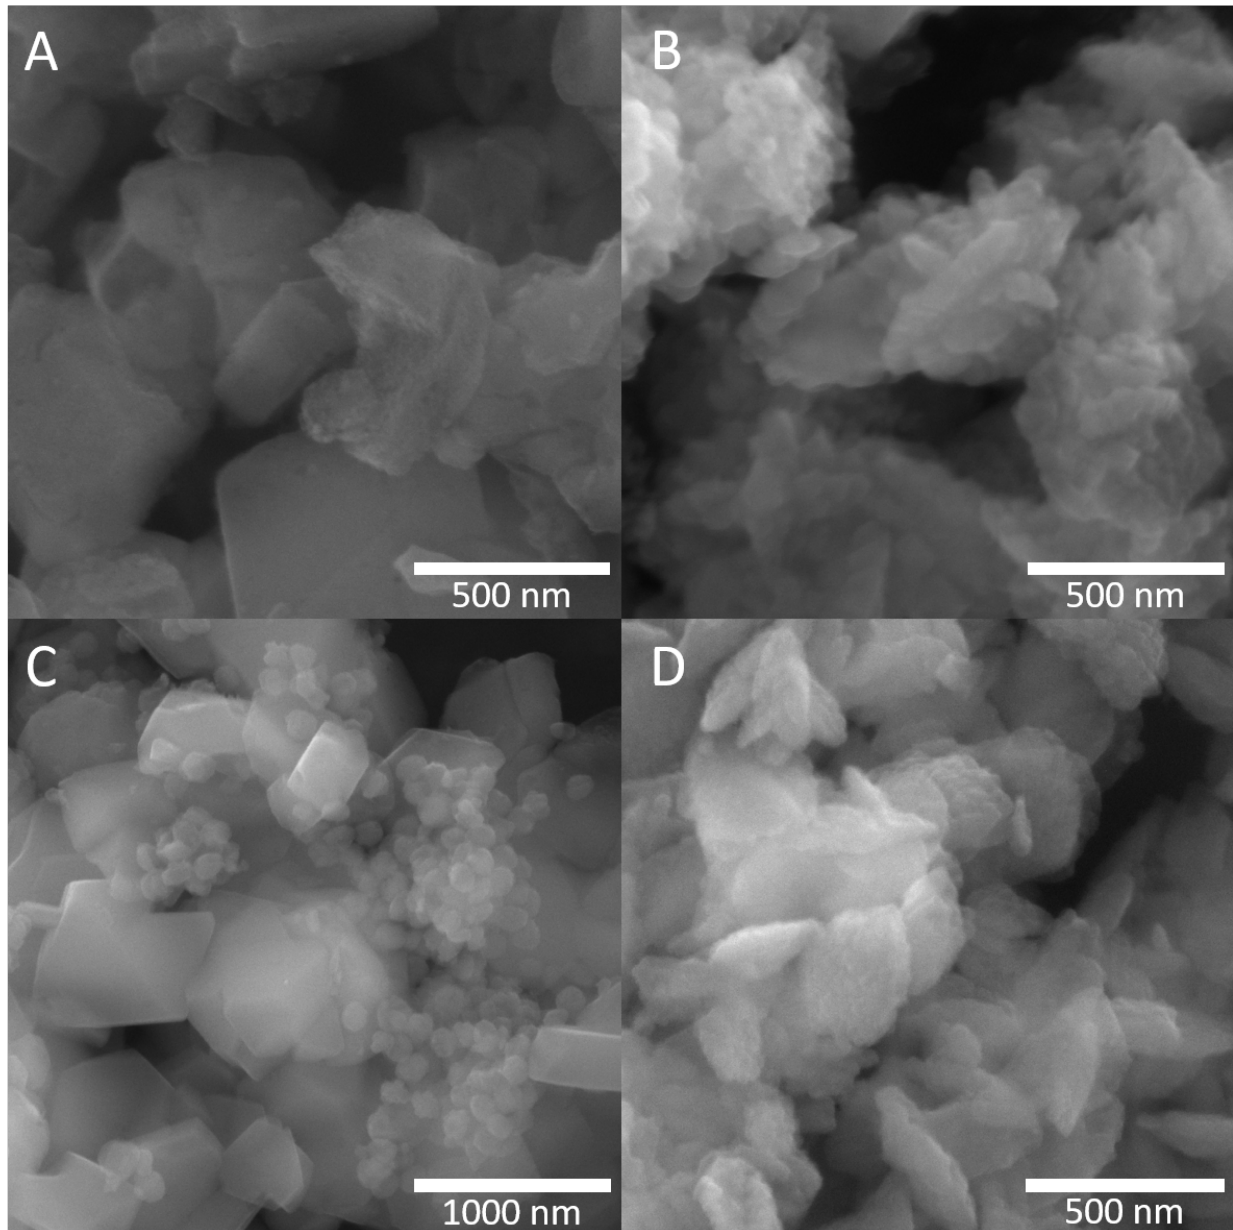

**Figure S1: SEM images of (A) FAU(15), (B) CHA(2.3), (C) FAU(2.6), and (D) CHA(1.9) zeolite samples**

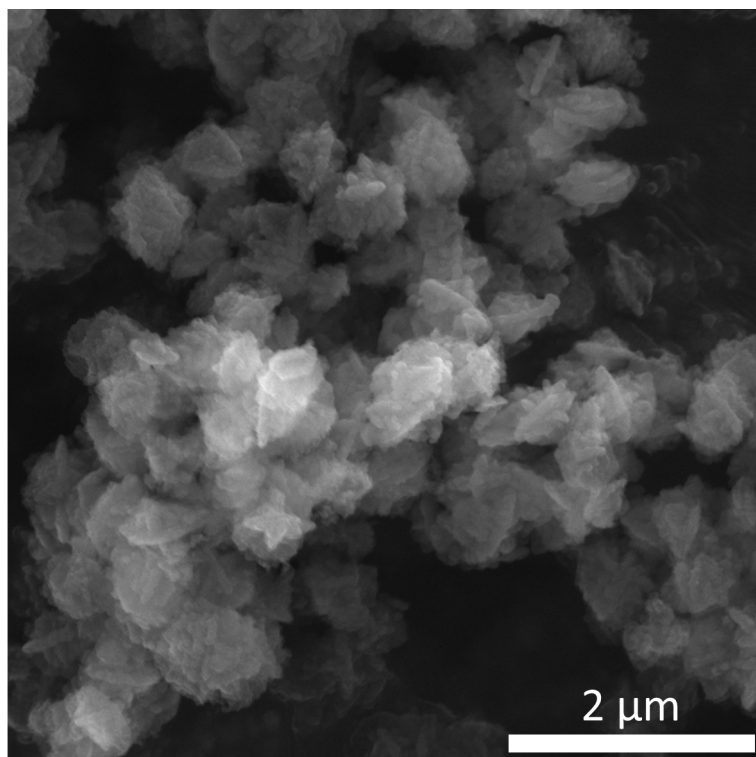

**Figure S2: SEM image of CHA(2.3) zeolite**

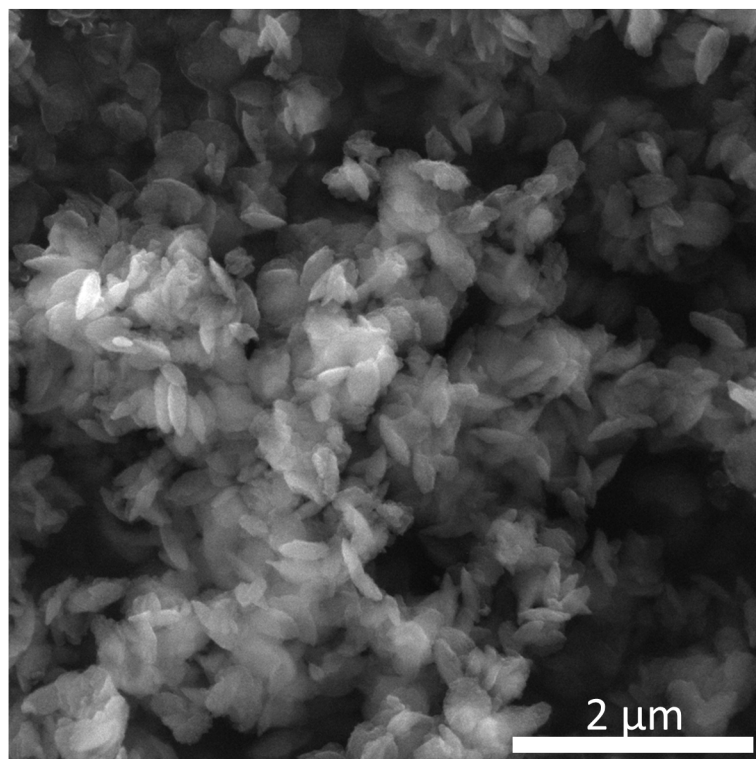

**Figure S3: SEM image of CHA(1.9) zeolite**

**TEM images**

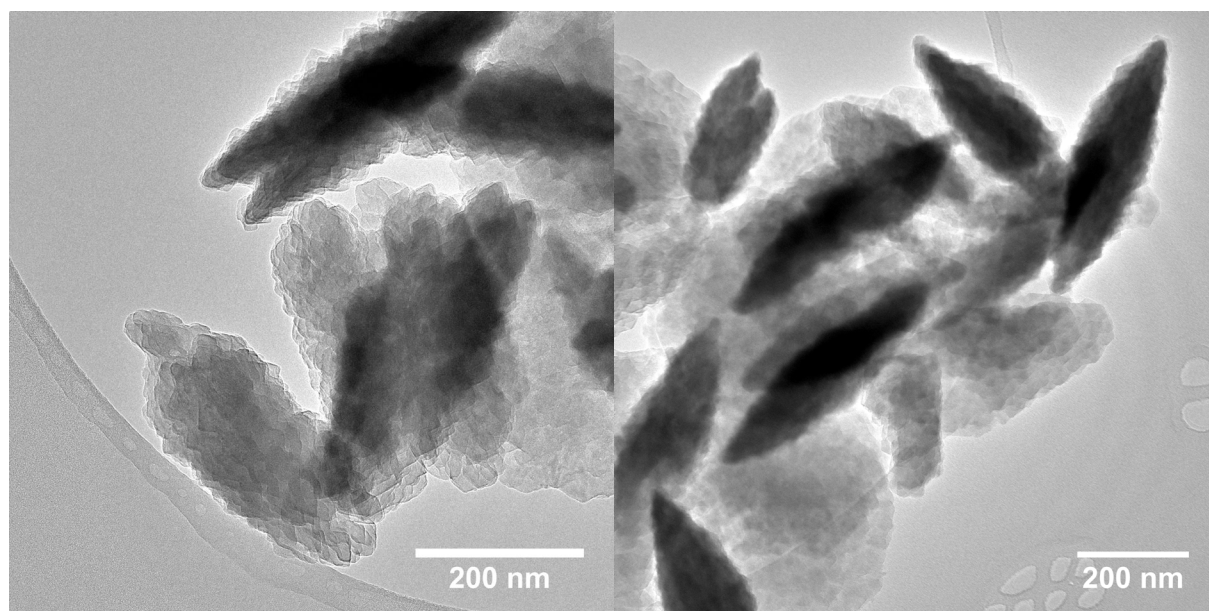

**Figure S4: TEM image of CHA(1.9)**

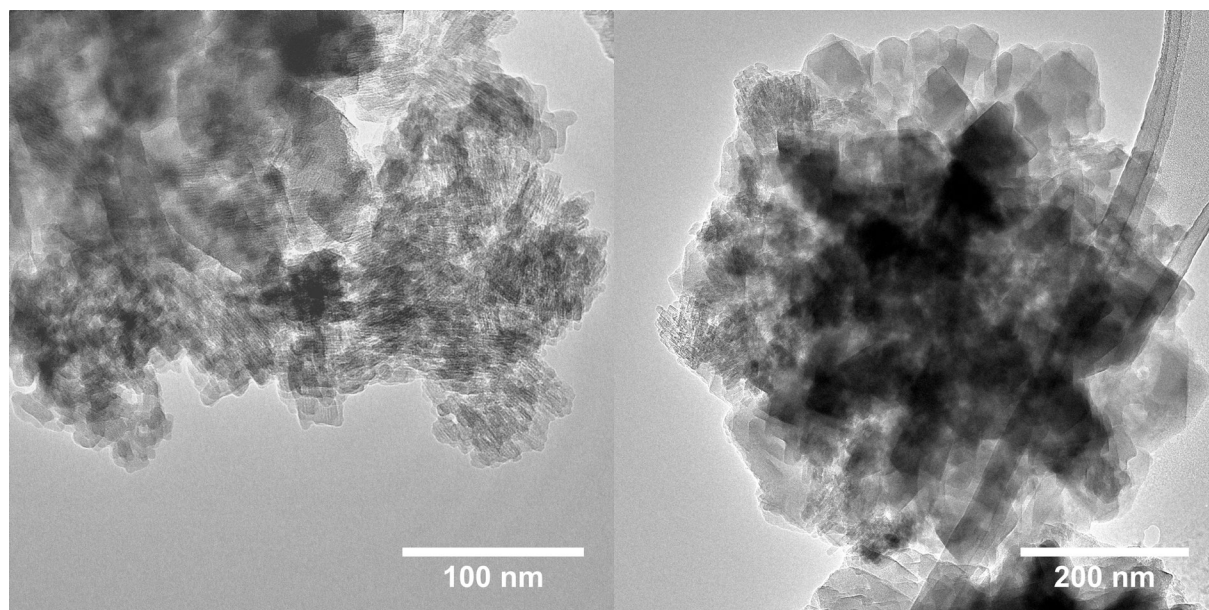

**Figure S5: TEM image of CHA(2.3)**

**Nitrogen physisorption of FAU(2.6), FAU(15), CHA(1.9), and CHA(2.3) zeolite samples**

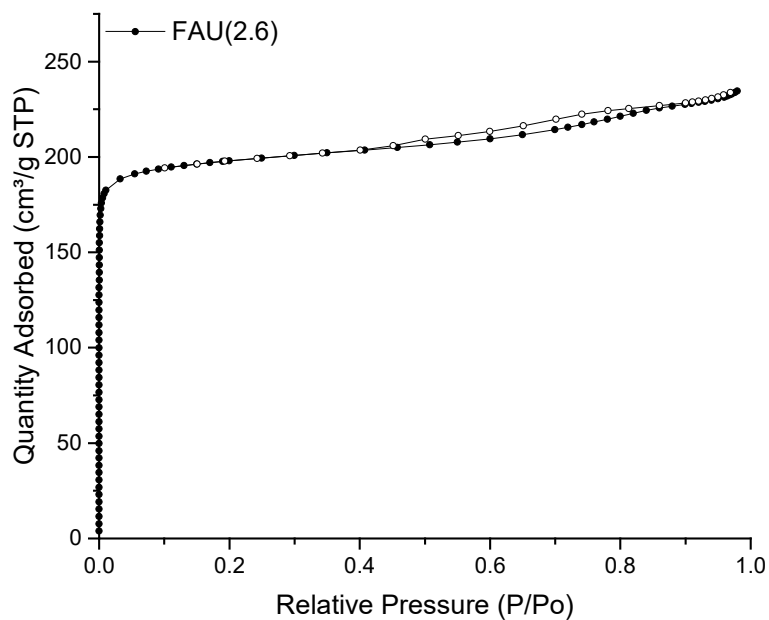

**Figure S6: Nitrogen physisorption isotherm of FAU(2.6) zeolite at 77K**

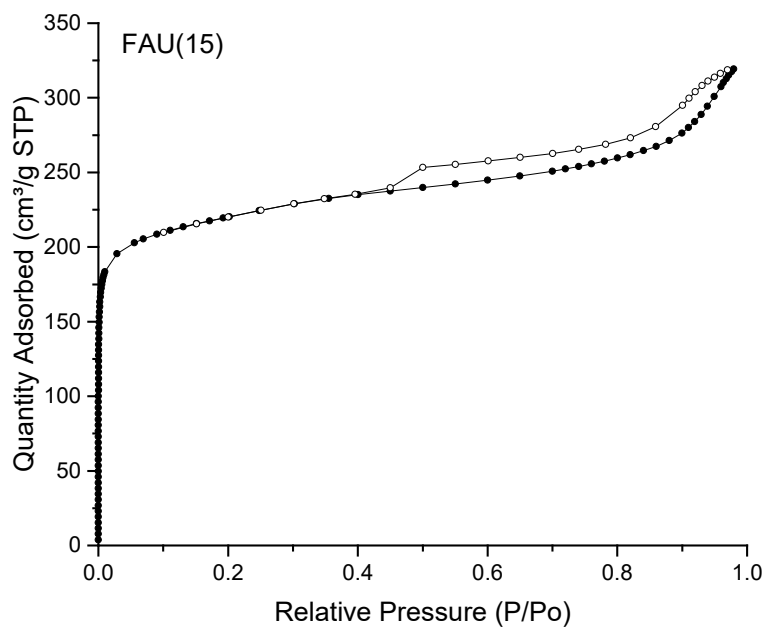

**Figure S7: Nitrogen physisorption isotherm of FAU(15) zeolite at 77K**

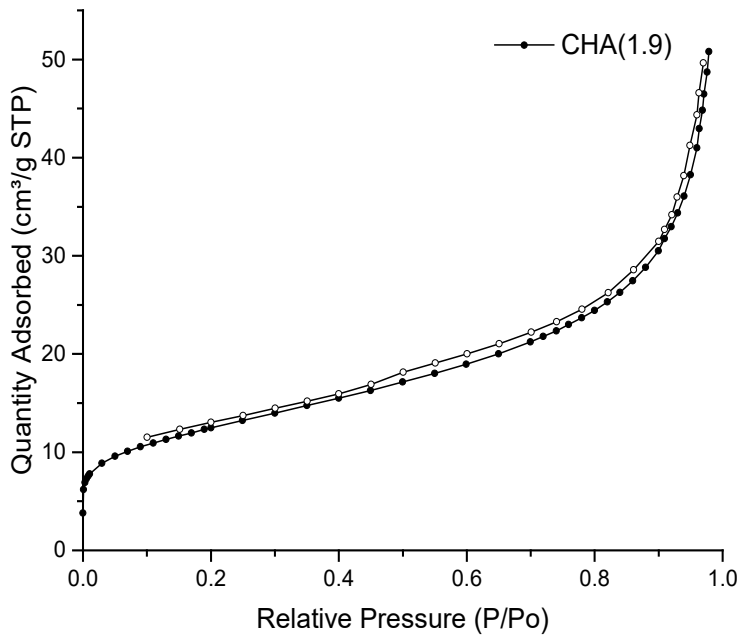

**Figure 8: Nitrogen physisorption of CHA(1.9) at 77 K**

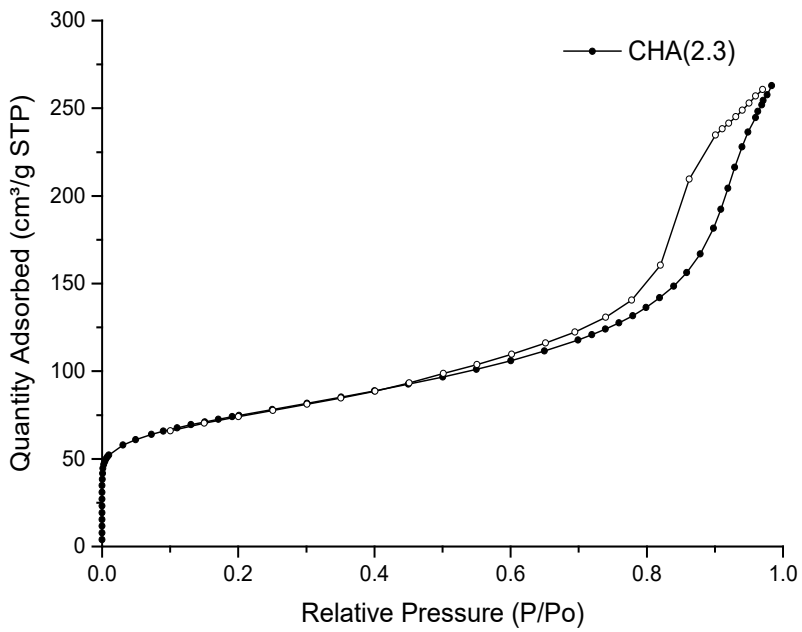

**Figure S9: Nitrogen physisorption of CHA(2.3) at 77 K**

**Table S3.** Calculated porosity of FAU and CHA samples by N<sub>2</sub> physisorption at 77 K

| Sample   | V <sub>total</sub> (cm <sup>3</sup> /g) <sup>a</sup> | V <sub>micropore</sub> (cm <sup>3</sup> /g) <sup>b</sup> | S <sub>BET</sub> (m <sup>2</sup> /g) <sup>c</sup> | S <sub>ext</sub> (m <sup>2</sup> /g) <sup>b,c</sup> |
|----------|------------------------------------------------------|----------------------------------------------------------|---------------------------------------------------|-----------------------------------------------------|
| FAU(2.6) | 0.49                                                 | 0.280                                                    | 695                                               | 140                                                 |
| FAU(15)  | 0.36                                                 | 0.280                                                    | 606                                               | 62                                                  |
| CHA(1.9) | 0.07                                                 | 0.004                                                    | 43                                                | 33                                                  |
| CHA(2.3) | 0.39                                                 | 0.045                                                    | 251                                               | 162                                                 |

<sup>a</sup> Single point adsorption <sup>b</sup> Determined by the t-plot method <sup>c</sup> Determined by the Brunauer-Emmett-Teller method

### CO<sub>2</sub> FTIR spectroscopic study

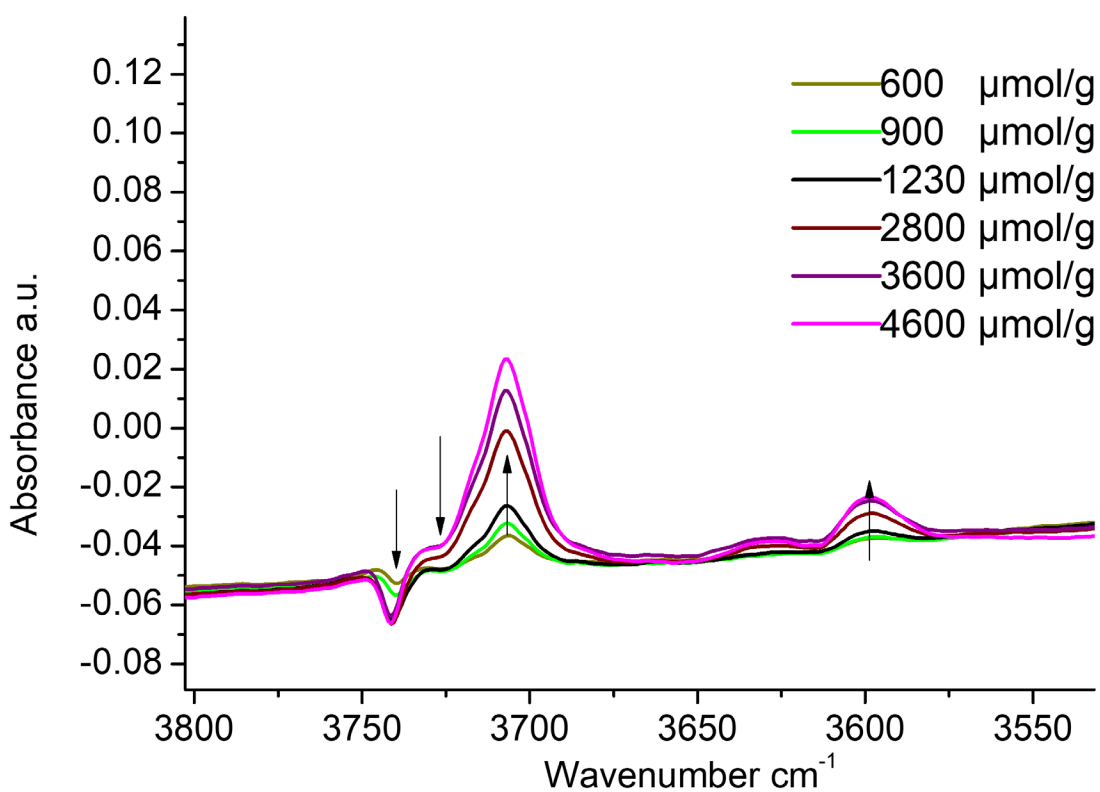

**Figure S10.** IR spectra of CO<sub>2</sub> adsorbed on CHA(2.3) in the region of 3820-3510 cm<sup>-1</sup>



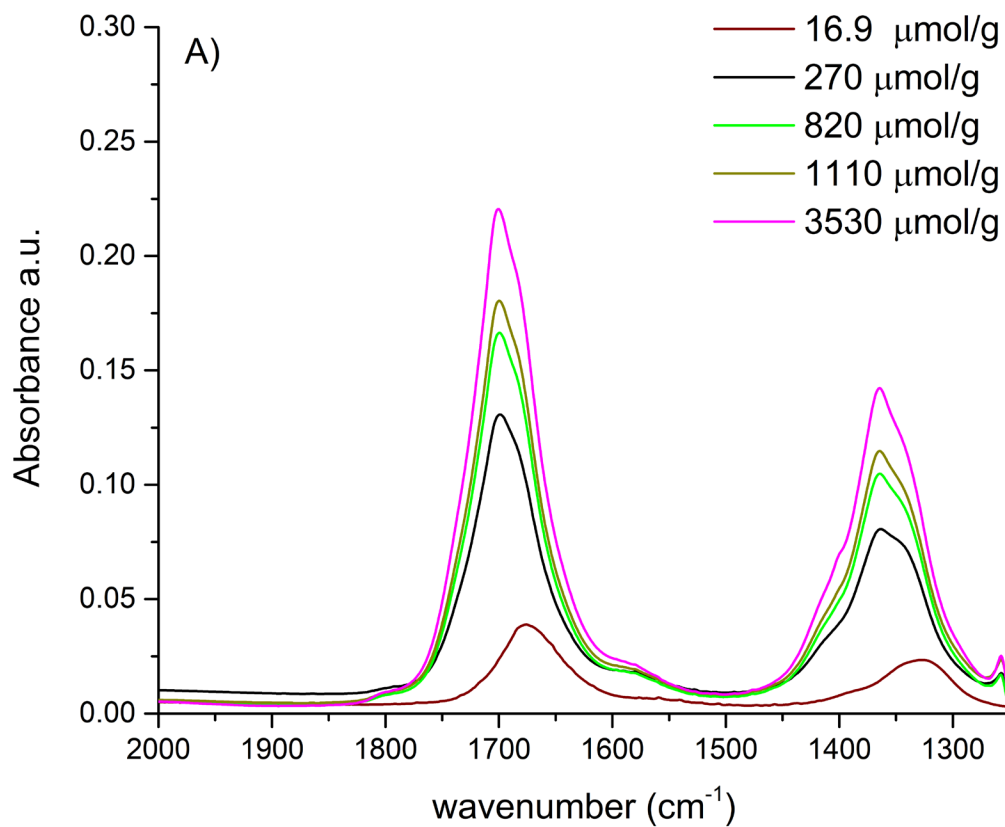

Figure S11. IR spectra of pulsed  $\text{CO}_2$  adsorbed on CHA(1.9) in the region of 2000-1250  $\text{cm}^{-1}$

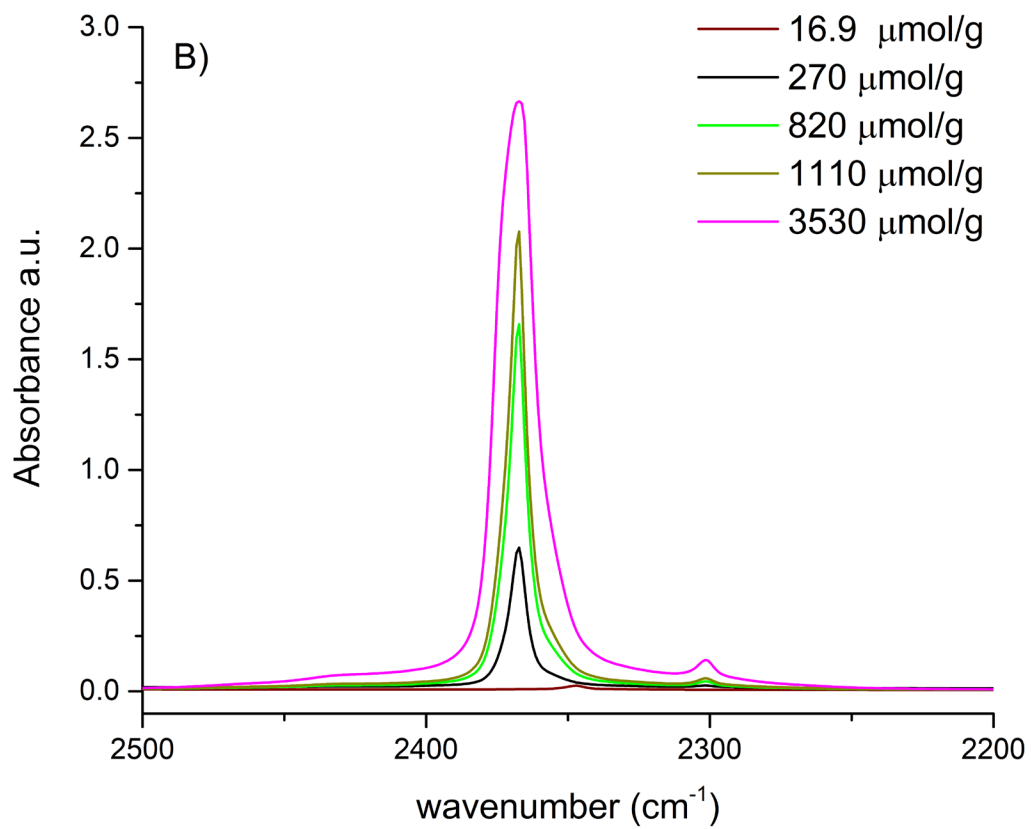

Figure S12. IR spectra of pulsed  $\text{CO}_2$  adsorbed on CHA(1.9) in the region of 2500-2200  $\text{cm}^{-1}$

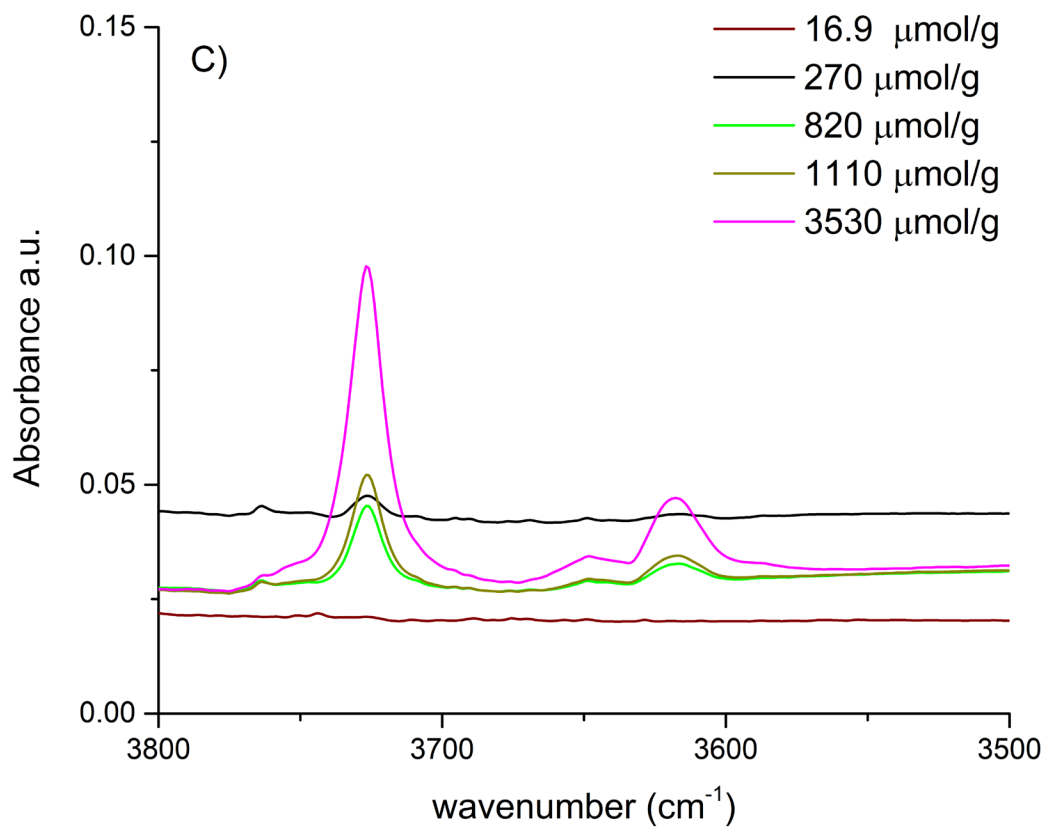

Figure S13. IR spectra of pulsed  $\text{CO}_2$  adsorbed on CHA(1.9) in the region of  $3800\text{-}3500 \text{ cm}^{-1}$

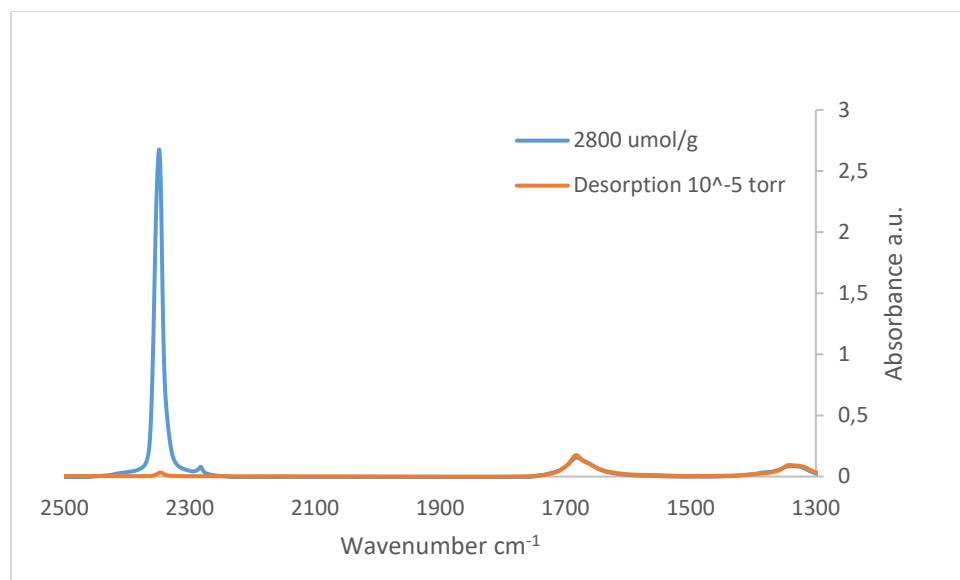

**Figure S14: IR spectra of pulsed CO<sub>2</sub> adsorbed on CHA(2.3) and after desorption at 10<sup>-5</sup> torr**

## CO FTIR spectroscopic study

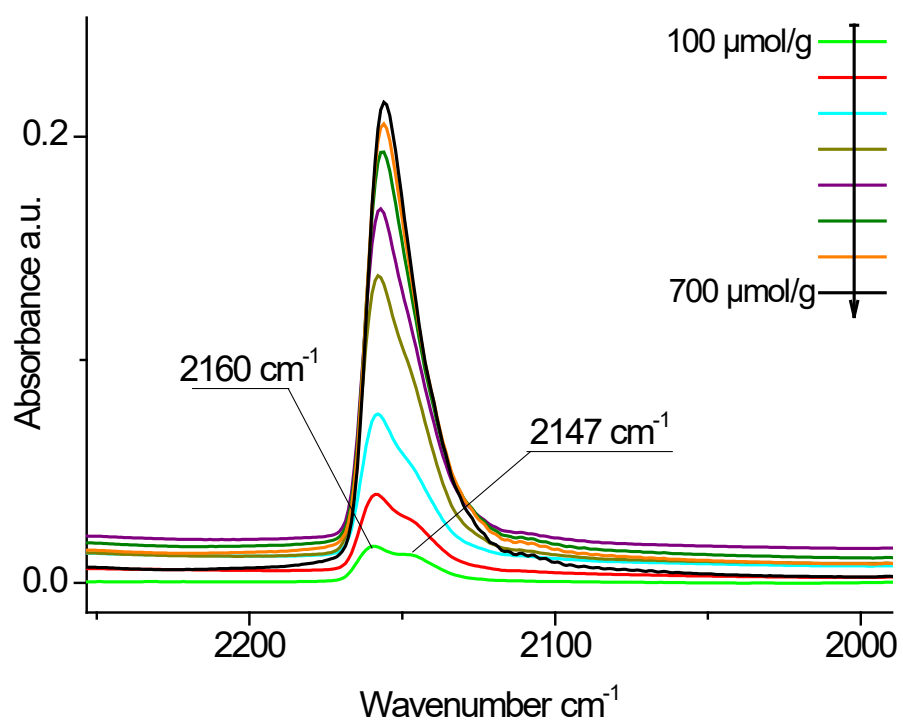

Figure S15. IR spectra of CO adsorbed on CHA(1.9) at 77 K.
